# Supplementary material
Source: PubMed Central journal article supplement (PMC5817597)
Supplement: jama-318-371-s001.pdf [file jama-318-371-s001.pdf]

## Supplementary Online Content

Larsson SC, Burgess S, Michaëlsson K. Association of genetic variants related to serum calcium levels with coronary artery disease and myocardial infarction. *JAMA*. doi:10.1001/jama.2017.8981

**eTable.** *P* Values for Associations of the Calcium-Associated Genetic Variants with Cardiometabolic Traits

**eFigure.** Mendelian Randomization Estimates of the Association Between Genetically Predicted Serum Calcium Levels and Myocardial Infarction

This supplementary material has been provided by the authors to give readers additional information about their work.

**eTable 1. P Values for Associations of the Calcium-Associated Genetic Variants with Cardiometabolic Traits**

| SNP        | Nearby Gene          | GLGC                                   |                                        |                                          | MAGIC                                   |                                        | DIAGRAM                                | GIANT                                  |                                        | ICBP |       |
|------------|----------------------|----------------------------------------|----------------------------------------|------------------------------------------|-----------------------------------------|----------------------------------------|----------------------------------------|----------------------------------------|----------------------------------------|------|-------|
|            |                      | HDL-C                                  | LDL-C                                  | TGs                                      | FG                                      | FI                                     | T2D                                    | BMI                                    | WHR aBMI                               | SBP  | DBP   |
| rs1801725  | <i>CASR</i>          | 0.088                                  | 0.25                                   | 0.97                                     | 0.68                                    | 0.90                                   | 0.35                                   | 0.38                                   | 0.26                                   | 0.26 | 0.97  |
| rs1570669  | <i>CYP24A1</i>       | 0.84                                   | 0.60                                   | 0.13                                     | 0.32                                    | 0.070                                  | 0.097                                  | 0.68                                   | 0.67                                   | 0.96 | 0.98  |
| rs1550532  | <i>DGKD</i>          | 0.59                                   | 0.77                                   | 0.19                                     | 0.92                                    | $8.9 \times 10^{-3}$                   | 0.58                                   | 0.51                                   | 0.91                                   | 0.11 | 0.12  |
| rs7481584  | <i>CARS</i>          | $7.7 \times 10^{-3}$                   | 0.48                                   | 0.47                                     | 0.95                                    | 0.26                                   | 0.015                                  | 0.034                                  | 0.24                                   | 0.68 | 0.40  |
| rs780094*  | <i>GCKR</i>          | <b><math>2.7 \times 10^{-3}</math></b> | <b><math>1.0 \times 10^{-7}</math></b> | <b><math>2.6 \times 10^{-220}</math></b> | <b><math>2.5 \times 10^{-12}</math></b> | <b><math>9.8 \times 10^{-5}</math></b> | <b><math>1.0 \times 10^{-5}</math></b> | <b><math>7.0 \times 10^{-5}</math></b> | <b><math>1.8 \times 10^{-3}</math></b> | 0.31 | 0.54  |
| rs7336933  | <i>DGKH/KIAA0564</i> | 0.67                                   | 0.54                                   | 0.78                                     | 0.52                                    | 0.65                                   | 0.87                                   | 0.54                                   | 0.78                                   | 0.27 | 0.055 |
| rs10491003 | <i>GATA3</i>         | 0.81                                   | 0.047                                  | 0.65                                     | 0.94                                    | 0.67                                   | 0.83                                   | 0.24                                   | 0.044                                  | 0.96 | 0.92  |

Bolded values are  $P < .007$  (Bonferroni corrected significance level, adjusted for the number of calcium-associated SNPs [n=7]). BMI, body mass index; DBP, diastolic blood pressure; DIAGRAM, Diabetes Genetics Replication and Meta-analysis; FG, fasting glucose; FI, fasting insulin; GIANT, Genetic Investigation of Anthropometric Traits; GLGC, Global Lipids Genetics Consortium; HDL-C, high-density lipoprotein cholesterol; ICBP, International Consortium of Blood Pressure Genome-Wide Association Studies; LDL-C, low-density lipoprotein cholesterol; MAGIC, Meta-Analyses of Glucose and Insulin-related traits Consortium; SNP, single-nucleotide polymorphism; SBP, systolic blood pressure; T2D, type 2 diabetes; TGs, triglycerides; Total-C, total cholesterol; WHR aBMI, waist-to-hip ratio adjusted for body mass index.

\*This SNP was excluded from the analyses because of pleiotropic associations with cardiometabolic traits.

**eFigure 1. Mendelian Randomization Estimates of the Association Between Genetically Predicted Serum Calcium Levels and Myocardial Infarction<sup>a</sup>**

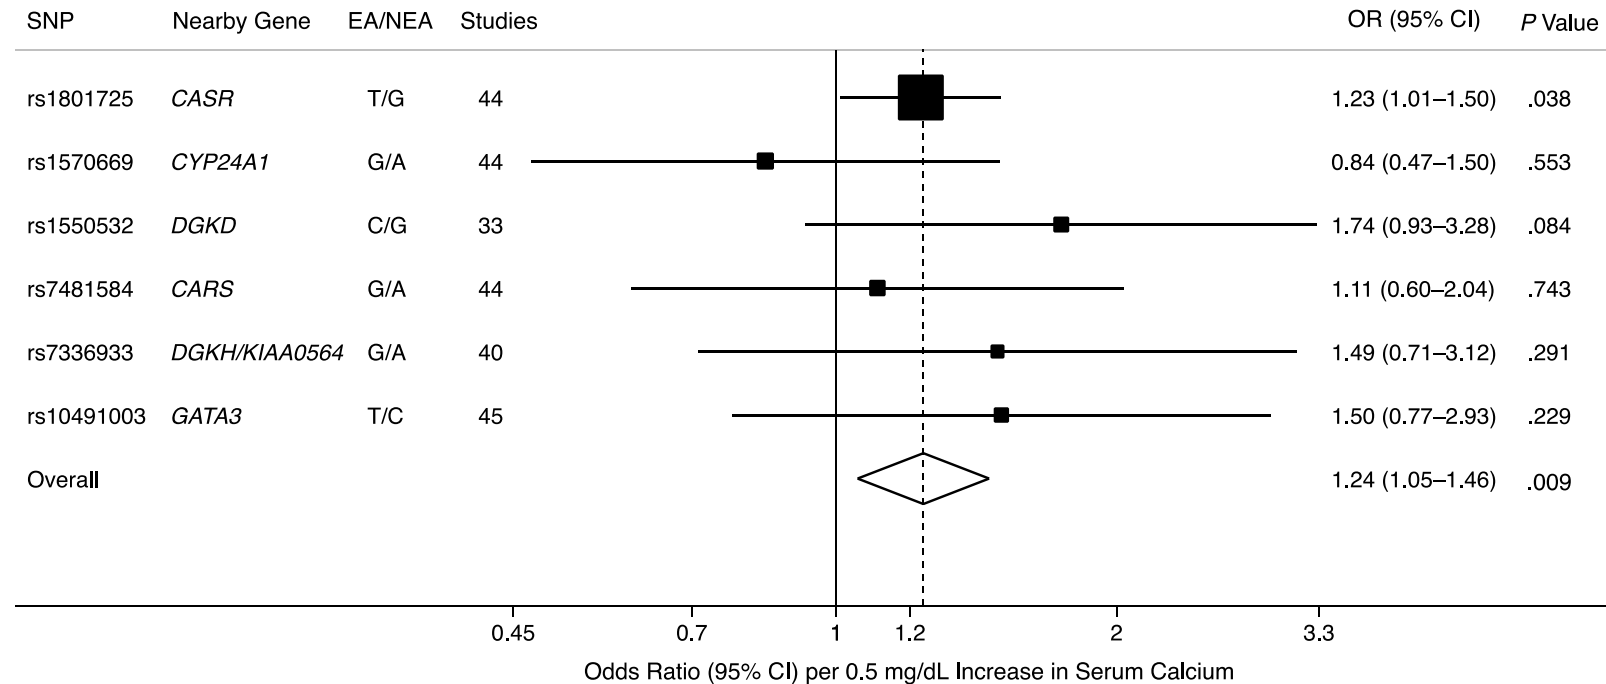

CI, confidence interval; EA, effect allele; NEA, non-effect allele; OR, odds ratio; SNP, single-nucleotide polymorphism.

<sup>a</sup>Odds ratios are per 0.5 mg/dL (about 1-SD) increase in genetically predicted serum calcium levels. Squares indicate the OR for the association of each calcium-associated SNP with myocardial infarction (size of the square is inversely proportional to variance of the estimate); horizontal lines indicate 95 CIs; diamond indicates the overall OR estimate with its 95% CI.
